# Supplementary material
Source: MDPI journal article supplement (https://www.mdpi.com/2073-4441/14/19/3183)
Supplement: s1 [file s1]

## Supplemental Figures:

**Table S1.** Numbers of OTUs and taxa, diversity and community richness indices in different seasons.

| Sample name | OTUs   | Shannon Index | Simpson Index | Chao1   | ACE     | Taxa number |
|-------------|--------|---------------|---------------|---------|---------|-------------|
| spring      | 256448 | 6.2           | 0.934         | 973.077 | 994.402 | 801         |
| summer      | 208240 | 5.6           | 0.863         | 786.325 | 797.225 | 672         |
| autumn      | 173176 | 7.4           | 0.943         | 931.947 | 920.455 | 886         |
| winter      | 208944 | 4.1           | 0.775         | 852.994 | 905.44  | 671         |

**Table S2.** Microbial community compositions at phylum level.

|                       | Total taxonomy (%) | Spring | Summer | Autumn | Winter |
|-----------------------|--------------------|--------|--------|--------|--------|
| Proteobacteria        | 57.9               | 52.2   | 51.2   | 38.6   | 89.7   |
| Bacteroidetes         | 13.9               | 19.9   | 15.0   | 13.9   | 6.9    |
| Firmicutes            | 11.0               | 2.0    | 18.6   | 22.6   | 1.1    |
| Unidentified Bacteria | 6.4                | 22.5   | 1.7    | 0.6    | 0.6    |
| Actinobacteria        | 4.3                | 0.6    | 4.4    | 12.0   | 0.3    |
| Acidobacteria         | 1.1                | 0.1    | 1.3    | 3.0    | 0.1    |
| Fusobacteria          | 1.1                | 0.3    | 0.4    | 3.0    | 0.6    |
| Spirochaetes          | 0.7                | 0.2    | 2.3    | 0.4    | 0.0    |
| Chloroflexi           | 0.6                | 0.0    | 0.8    | 1.5    | 0.0    |
| Cyanobacteria         | 0.6                | 1.2    | 0.6    | 0.5    | 0.1    |
| others                | 2.4                | 1.0    | 3.7    | 3.9    | 0.6    |

**Table S3.** Microbial community compositions at class level.

|                            | Total taxonomy (%) | Spring | Summer | Autumn | Winter |
|----------------------------|--------------------|--------|--------|--------|--------|
| <i>Gammaproteobacteria</i> | 40.9               | 82.4   | 29.9   | 40.7   | 10.7   |
| <i>Alphaproteobacteria</i> | 14.2               | 6.8    | 17.5   | 7.3    | 25.4   |
| <i>Bacteroidia</i>         | 13.9               | 6.9    | 19.9   | 15.0   | 13.7   |
| <i>Clostridia</i>          | 7.0                | 0.9    | 1.9    | 11.7   | 13.6   |
| Unidentified Bacteria      | 6.4                | 0.6    | 22.5   | 1.7    | 0.6    |
| <i>Bacilli</i>             | 3.5                | 0.1    | 0.0    | 6.1    | 7.7    |
| <i>Deltaproteobacteria</i> | 2.7                | 0.4    | 4.7    | 3.2    | 2.4    |
| <i>Actinobacteria</i>      | 2.4                | 0.1    | 0.4    | 2.3    | 6.7    |
| <i>Fusobacteriia</i>       | 1.1                | 0.6    | 0.3    | 0.4    | 3.0    |
| others                     | 7.9                | 1.2    | 2.9    | 11.6   | 16.2   |
